# Supplementary material for: Warm-air entrainment and advection during alpine blowing snow events
Source: Copernicus journal article supplement (doi:10.5194/tc-14-2795-2020), 2020-09-01
Supplement: Supplementary file 1 [file tc-14-2795-2020-supplement.zip]

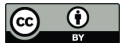

## *Supplement of*

# **Warm-air entrainment and advection during alpine blowing snow events**

**Nikolas O. Aksamit and John W. Pomeroy**

*Correspondence to:* Nikolas Aksamit ([naksamit@ethz.ch](mailto:naksamit@ethz.ch))

- [tc-14-2795-2020-supplement-title-page.pdf](#)
- [tc-2020-46-supplement-version2](#)
  - [DryAir\\_Supplement.docx](#)
  - [SquaredResiduals\\_KN1994\\_Fitting.csv](#)

The copyright of individual parts of the supplement might differ from the CC BY 4.0 License.
